# Supplementary material
Source: Springer Nature journal article supplement (https://www.springermedizin.de/resource/supplementary/12891_2010_1091_MOESM1_ESM.pdf/9507690)

ROM (degrees)

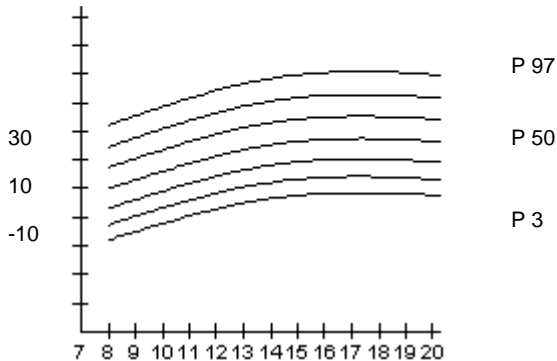

Age (years)

Supplement: MOESM1 [file 9507690]
